# Supplementary material for: Analysis of Metabolites Changes on Obstructive Sleep Apnea Patients After Multilevel Sleep Surgery
Source: Preprints.org preprint supplement (doi:10.20944/preprints202007.0327.v1), 2020-07-15
Supplement: Supplementary file 1 [file supplementary]

## Sheet: OSA Metabolomics Pre-Post Surg
Variable	Mean T0	Mean T1	P-Value	Mean difference	N	confidence interval	T-test-P-Value	Wilcox-P-Value	Shapiro-P-value	final-p-value
AC.0.0.	44.76	44.71	0.9834	0.0538462	39	95% CI(-2.4 - 2.51)	0.964821	0.630186	4.53726e-06	0.630186
AC.2.0.	6.36	6.23	0.8033	0.132564	39	95% CI(-0.64 - 0.91)	0.730296	0.839639	8.44775e-05	0.839639
AC.3.0.	0.38	0.4	0.399	-0.0253846	39	95% CI(-0.07 - 0.02)	0.267528	0.446233	0.00463756	0.446233
Ala	431.46	426.95	0.8232	4.51282	39	95% CI(-21.69 - 30.71)	0.729252	0.807055	0.88578	0.729252
Arg	81.35	87.65	0.3236	-6.3	39	95% CI(-13.56 - 0.96)	0.0868875	0.114811	0.00742461	0.114811
Asn	55.52	55.2	0.8765	0.317949	39	95% CI(-2.11 - 2.75)	0.792779	0.812468	0.248357	0.792779
Asp	8.84	8.85	0.9876	-0.00666667	39	95% CI(-0.83 - 0.82)	0.987017	0.944371	0.15973	0.987017
Cit	36.23	37.46	0.6303	-1.23846	39	95% CI(-4.52 - 2.05)	0.45021	1	0.0158274	1
Gln	741.23	755.74	0.4805	-14.5128	39	95% CI(-45.9 - 16.87)	0.355109	0.364356	0.610832	0.355109
Glu	91.11	88.91	0.7597	2.20513	39	95% CI(-5.56 - 9.97)	0.568769	0.525439	0.0240245	0.525439
Gly	261.62	258.31	0.7796	3.30769	39	95% CI(-9.74 - 16.35)	0.610674	0.695352	0.0387293	0.695352
His	92.09	94.61	0.3686	-2.52308	39	95% CI(-6.25 - 1.2)	0.178567	0.364678	0.00184213	0.364678
Lys	205.21	210.46	0.5343	-5.25641	39	95% CI(-19.63 - 9.12)	0.463614	1	0.44862	0.463614
Met	30.97	31.91	0.531	-0.933333	39	95% CI(-3.36 - 1.49)	0.440298	0.873244	0.836693	0.440298
Orn	106.54	99.53	0.3363	7.01538	39	95% CI(-1.5 - 15.53)	0.10349	0.199169	0.139308	0.10349
Phe	67.82	68	0.9417	-0.184615	39	95% CI(-3.38 - 3.01)	0.907476	0.972168	0.0309227	0.972168
Pro	212.08	212.56	0.9648	-0.487179	39	95% CI(-13.71 - 12.74)	0.940935	0.890404	0.382027	0.940935
Ser	114.72	114.94	0.9603	-0.217949	39	95% CI(-6.18 - 5.74)	0.94137	0.844744	0.139891	0.94137
Thr	150.03	157.85	0.2892	-7.82051	39	95% CI(-17.22 - 1.58)	0.100245	0.0222841	0.0600879	0.100245
Trp	67.17	69.18	0.4465	-2.01282	39	95% CI(-5.61 - 1.59)	0.264568	0.502949	0.68605	0.264568
Tyr	79.4	81.86	0.4837	-2.45641	39	95% CI(-7.56 - 2.64)	0.335808	0.571668	0.726612	0.335808
Val	298.51	312.92	0.2629	-14.4103	39	95% CI(-37.51 - 8.69)	0.214377	0.476621	0.569942	0.214377
xLeu	241.85	249	0.5816	-7.15385	39	95% CI(-28.75 - 14.45)	0.506628	0.753496	0.976601	0.506628
ADMA	0.54	0.53	0.6167	0.00871795	39	95% CI(-0.01 - 0.03)	0.341986	0.228165	0.483774	0.341986
Creatinine	85.63	85.74	0.9816	-0.112821	39	95% CI(-4.62 - 4.39)	0.959856	0.873254	0.14331	0.959856
Kynurenine	2.12	2.09	0.7733	0.0320513	39	95% CI(-0.09 - 0.16)	0.607479	0.398491	0.132483	0.607479
Met.SO	0.93	0.97	0.4501	-0.0405128	39	95% CI(-0.12 - 0.04)	0.326389	0.556803	0.0471497	0.556803
PEA	0.02	0.02	0.5267	-0.00179487	39	95% CI(-0.01 - 0)	0.53821	0.508409	0.00453188	0.508409
SDMA	0.47	0.47	0.782	-0.00538462	39	95% CI(-0.03 - 0.02)	0.714518	0.947919	0.140947	0.714518
Sarcosine	4.87	4.66	0.4598	0.20359	39	95% CI(-0.22 - 0.63)	0.33541	0.329021	0.84144	0.33541
Serotonin	0.8	0.8	0.9859	-0.00179487	39	95% CI(-0.16 - 0.16)	0.982326	0.894526	0.0288637	0.894526
Spermidine	0.27	0.27	0.6437	0.00820513	39	95% CI(-0.02 - 0.03)	0.513895	0.260881	0.0158688	0.260881
Taurine	127.19	125.21	0.8403	1.97949	39	95% CI(-17.3 - 21.26)	0.836441	0.261248	0.117656	0.836441
alpha.AAA	1.94	1.87	0.7404	0.0689744	39	95% CI(-0.29 - 0.43)	0.702327	0.209668	0.0510141	0.702327
t4.OH.Pro	12	13.14	0.4413	-1.13846	39	95% CI(-3.71 - 1.43)	0.37575	0.774808	0.0735169	0.37575
LPC.12.0.	0.14	0.14	0.8206	0.00128205	39	95% CI(-0.01 - 0.01)	0.798447	0.761553	0.00128263	0.761553
LPC.14.0.	3.8	3.83	0.6507	-0.0374359	39	95% CI(-0.17 - 0.1)	0.576662	0.823309	0.0342412	0.823309
LPC.15.0.	0.59	0.59	0.8381	-0.00666667	39	95% CI(-0.06 - 0.05)	0.812434	0.961039	0.0285465	0.961039
LPC.16.0.	89.6	88.37	0.7607	1.23333	39	95% CI(-4.72 - 7.18)	0.677147	0.660228	0.00318343	0.660228
LPC.16.1.	1.94	1.84	0.4253	0.0994872	39	95% CI(-0.1 - 0.3)	0.317395	0.379265	0.0459606	0.379265
LPC.17.0.	1.65	1.68	0.8276	-0.0276923	39	95% CI(-0.18 - 0.13)	0.719554	0.650134	3.16801e-07	0.650134
LPC.17.1.	0.18	0.18	0.7176	-0.00564103	39	95% CI(-0.03 - 0.02)	0.637942	0.631674	0.0001204	0.631674
LPC.18.0.	18.5	17.82	0.4261	0.677949	39	95% CI(-0.87 - 2.22)	0.379618	0.216796	0.587215	0.379618
LPC.18.1.	6.96	6.82	0.6975	0.142821	39	95% CI(-0.37 - 0.66)	0.576531	0.476637	0.0169782	0.476637
LPC.18.2.	5.05	5.17	0.7741	-0.121282	39	95% CI(-0.67 - 0.43)	0.656032	0.655185	4.26643e-05	0.655185
LPC.20.0.	0.16	0.17	0.0745	-0.0171795	39	95% CI(-0.03 - 0)	0.0194039	0.056193	0.498821	0.0194039
LPC.20.1.	0.11	0.11	0.8353	-0.00179487	39	95% CI(-0.02 - 0.01)	0.799766	0.601486	0.520118	0.799766
LPC.20.2.	0.19	0.19	0.9647	-0.000512821	39	95% CI(-0.02 - 0.02)	0.960697	0.959045	0.0316948	0.959045
LPC.20.3.	1.08	1.04	0.6673	0.0435897	39	95% CI(-0.09 - 0.18)	0.517035	0.47231	0.0560685	0.517035
LPC.20.4.	6.02	5.7	0.3809	0.312051	39	95% CI(-0.22 - 0.85)	0.243881	0.249603	0.127607	0.243881
LPC.22.5.	0.18	0.17	0.6489	0.00564103	39	95% CI(-0.01 - 0.02)	0.502642	0.592305	0.00033852	0.592305
LPC.22.6.	0.88	0.87	0.9786	0.00153846	39	95% CI(-0.09 - 0.1)	0.974326	0.845085	0.00079362	0.845085
LPC.O.16.1.	1.42	1.4	0.847	0.0164103	39	95% CI(-0.12 - 0.15)	0.808069	0.883501	9.13214e-05	0.883501
LPC.O.18.0.	0.47	0.49	0.4305	-0.0189744	39	95% CI(-0.05 - 0.02)	0.276854	0.241413	0.0217546	0.241413
LPC.O.18.1.	1.1	1.09	0.8965	0.00717949	39	95% CI(-0.08 - 0.09)	0.869392	0.856023	0.0210768	0.856023
LPC.O.18.2.	0.14	0.14	0.6239	0.00282051	39	95% CI(-0.01 - 0.01)	0.582708	0.713651	0.000532253	0.713651
PC.30.0.	2.17	2.17	0.9896	-0.00333333	39	95% CI(-0.38 - 0.37)	0.985847	0.939518	1.01885e-05	0.939518
PC.30.3.	20.68	20.32	0.8824	0.361282	39	95% CI(-2.01 - 2.73)	0.759118	0.884688	3.19619e-06	0.884688
PC.32.0.	8.18	8.14	0.9316	0.0369231	39	95% CI(-0.49 - 0.56)	0.887799	0.414284	0.00107351	0.414284
PC.32.1.	6.31	6.04	0.7104	0.270769	39	95% CI(-0.94 - 1.48)	0.653646	0.595906	5.06631e-05	0.595906
PC.32.2.	1.18	1.25	0.4791	-0.0669231	39	95% CI(-0.22 - 0.09)	0.396324	0.557787	0.120325	0.396324
PC.32.3.	0.23	0.23	0.9226	-0.00230769	39	95% CI(-0.04 - 0.03)	0.900293	0.937371	0.00104177	0.937371
PC.33.0.	0.9	0.96	0.641	-0.0561538	39	95% CI(-0.16 - 0.05)	0.287758	0.332057	1.53161e-07	0.332057
PC.33.1.	2.42	2.5	0.6981	-0.0761538	39	95% CI(-0.4 - 0.25)	0.639677	0.745698	0.165337	0.639677
PC.33.2.	1.89	2.03	0.2535	-0.140769	39	95% CI(-0.32 - 0.04)	0.121111	0.10104	0.298861	0.121111
PC.33.3.	0.54	0.58	0.2049	-0.0382051	39	95% CI(-0.09 - 0.02)	0.160181	0.4459	0.975844	0.160181
PC.33.4.	0.57	0.58	0.8133	-0.00769231	39	95% CI(-0.04 - 0.03)	0.650509	0.791607	0.117182	0.650509
PC.34.1.	199.68	197.69	0.8618	1.99231	39	95% CI(-13.86 - 17.84)	0.800495	0.566434	0.00306481	0.566434
PC.34.2.	404.1	419.54	0.5297	-15.4359	39	95% CI(-40.08 - 9.21)	0.212588	0.189576	0.00355952	0.189576
PC.34.3.	11.84	11.74	0.9044	0.0928205	39	95% CI(-1.24 - 1.43)	0.889005	0.922181	0.000237276	0.922181
PC.34.4.	3.83	3.76	0.8606	0.0689744	39	95% CI(-0.62 - 0.76)	0.840202	0.86152	0.000151676	0.86152
PC.34.5.	1.09	1.16	0.4228	-0.0661538	39	95% CI(-0.2 - 0.07)	0.329312	0.481791	0.0381844	0.481791
PC.35.0.	0.16	0.14	0.463	0.012	30	95% CI(-0.02 - 0.04)	0.377373	0.684147	0.0111969	0.684147
PC.35.1.	3.14	3.24	0.7139	-0.102051	39	95% CI(-0.41 - 0.21)	0.506441	0.737682	1.94486e-05	0.737682
PC.35.2.	8.73	9.35	0.3029	-0.620256	39	95% CI(-1.39 - 0.15)	0.111368	0.158696	0.00682836	0.158696
PC.35.3.	1.03	1.06	0.5998	-0.0333333	39	95% CI(-0.13 - 0.06)	0.479104	0.442065	0.027433	0.442065
PC.35.4.	0.85	0.88	0.6522	-0.0276923	39	95% CI(-0.13 - 0.08)	0.589182	0.877997	0.189649	0.589182
PC.35.5.	0.6	0.62	0.6155	-0.0191667	36	95% CI(-0.09 - 0.05)	0.573096	0.499407	0.984022	0.573096
PC.36.2.	191.36	193.31	0.8348	-1.94872	39	95% CI(-16.34 - 12.44)	0.785489	0.782874	0.460111	0.785489
PC.36.3.	126.38	128.85	0.7361	-2.4641	39	95% CI(-14.18 - 9.25)	0.672736	0.700741	0.00225013	0.700741
PC.36.4.	163.43	161.72	0.8187	1.71026	39	95% CI(-10.84 - 14.26)	0.784075	0.571618	0.00368966	0.571618
PC.36.5.	19.61	20.27	0.5616	-0.65641	39	95% CI(-1.87 - 0.56)	0.279934	0.304937	0.0152879	0.304937
PC.36.6.	0.02	0.02	0.7143	0.000769231	39	95% CI(0 - 0)	0.691294	0.679768	2.8587e-06	0.679768
PC.37.1.	0.31	0.3	0.7537	0.00487179	39	95% CI(-0.02 - 0.03)	0.68961	0.735374	0.90102	0.68961
PC.37.2.	0.68	0.72	0.2793	-0.0479487	39	95% CI(-0.11 - 0.01)	0.112338	0.126439	0.000545801	0.126439
PC.37.3.	1.39	1.45	0.6067	-0.0523077	39	95% CI(-0.2 - 0.1)	0.481829	0.727151	0.0277472	0.727151
PC.37.5.	2.85	2.97	0.4897	-0.122564	39	95% CI(-0.35 - 0.11)	0.290774	0.18213	0.00897485	0.18213
PC.37.6.	1.34	1.38	0.7227	-0.0369231	39	95% CI(-0.16 - 0.09)	0.558928	0.616825	2.39057e-05	0.616825
PC.37.7.	0.38	0.41	0.2694	-0.0353846	39	95% CI(-0.09 - 0.02)	0.171784	0.501828	0.0320447	0.501828
PC.38.0.	3.42	3.33	0.376	0.0864103	39	95% CI(-0.07 - 0.24)	0.263638	0.273271	0.657685	0.263638
PC.38.1.	1.2	1.18	0.7015	0.0210256	39	95% CI(-0.07 - 0.11)	0.646539	0.953738	0.0472361	0.953738
PC.38.3.	34.49	33.13	0.6022	1.35897	39	95% CI(-3.12 - 5.84)	0.542876	0.459528	0.235511	0.542876
PC.38.4.	112.18	107.22	0.4651	4.95641	39	95% CI(-4.45 - 14.36)	0.292803	0.175816	0.742198	0.292803
PC.38.5.	36.37	36.22	0.9186	0.148718	39	95% CI(-2.23 - 2.53)	0.900069	0.63019	0.0705203	0.900069
PC.38.6.	42.14	42.28	0.95	-0.141026	39	95% CI(-3.37 - 3.09)	0.930047	0.711519	0.0194073	0.711519
PC.38.7.	73.66	73.03	0.8813	0.623077	39	95% CI(-5.38 - 6.63)	0.834751	0.553103	0.00598028	0.553103
PC.39.3.	0.76	0.87	0.0851	-0.115385	39	95% CI(-0.22 - -0.01)	0.0390755	0.0940048	0.493477	0.0390755
PC.39.4.	0.9	0.91	0.7779	-0.00948718	39	95% CI(-0.04 - 0.02)	0.507365	0.454752	0.0425957	0.454752
PC.39.5.	0.26	0.26	0.9027	-0.00230769	39	95% CI(-0.02 - 0.02)	0.821715	0.969882	0.000291717	0.969882
PC.39.6.	1.35	1.34	0.9064	0.0115385	39	95% CI(-0.11 - 0.13)	0.843844	0.472813	0.0106722	0.472813
PC.39.7.	0.56	0.55	0.8724	0.0074359	39	95% CI(-0.04 - 0.06)	0.762248	0.422224	0.00619976	0.422224
PC.40.4.	4.72	4.6	0.6989	0.119744	39	95% CI(-0.45 - 0.69)	0.670481	0.523409	0.395336	0.670481
PC.40.5.	8.89	8.5	0.5035	0.393333	39	95% CI(-0.61 - 1.39)	0.430402	0.339108	0.532905	0.430402
PC.40.6.	22.17	21.28	0.5648	0.893333	39	95% CI(-1.58 - 3.37)	0.4692	0.47232	0.776954	0.4692
PC.40.7.	2.41	2.31	0.5264	0.0987179	39	95% CI(-0.1 - 0.3)	0.327991	0.168269	0.622041	0.327991
PC.40.8.	2.2	2.08	0.3711	0.116923	39	95% CI(-0.07 - 0.31)	0.221585	0.127814	0.00803615	0.127814
PC.40.9.	5.01	4.93	0.8594	0.0725641	39	95% CI(-0.42 - 0.56)	0.766308	0.724881	0.00387191	0.724881
PC.41.3.	0.54	0.56	0.4828	-0.0202703	37	95% CI(-0.07 - 0.03)	0.382475	0.391573	0.0257681	0.391573
PC.41.4.	1.32	1.31	0.9363	0.00769231	39	95% CI(-0.16 - 0.17)	0.925403	0.807057	0.530266	0.925403
PC.41.5.	0.37	0.34	0.0711	0.0297436	39	95% CI(0 - 0.06)	0.0303546	0.0196731	0.0503696	0.0303546
PC.41.8.	0.16	0.15	0.8635	0.00263158	38	95% CI(-0.01 - 0.02)	0.73473	0.580882	4.49296e-05	0.580882
PC.42.3.	0.37	0.25	0.0488	0.116154	39	95% CI(0.02 - 0.22)	0.0226416	0.0418016	0.0100726	0.0418016
PC.42.5.	0.05	0.05	0.3127	-0.00421053	38	95% CI(-0.01 - 0)	0.325714	0.32799	0.000228343	0.32799
PC.42.6.	0.1	0.1	0.6938	0.00194444	36	95% CI(-0.01 - 0.01)	0.617509	0.317664	0.292664	0.617509
PC.42.7.	0.22	0.22	0.7197	0.00641026	39	95% CI(-0.03 - 0.04)	0.692651	0.481583	0.00878534	0.481583
PC.42.10.	0.08	0.08	0.8189	-0.00128205	39	95% CI(-0.01 - 0.01)	0.697101	0.468566	0.07545	0.697101
PC.43.6.	0.68	0.66	0.6905	0.0135897	39	95% CI(-0.03 - 0.06)	0.55275	0.323936	0.901254	0.55275
PC.44.1.	5.05	3.91	0.0606	1.14217	23	95% CI(-0.04 - 2.32)	0.0572697	0.0777035	0.0620396	0.0572697
PC.44.10.	0.17	0.17	0.9372	0.00166667	36	95% CI(-0.05 - 0.05)	0.942781	0.947746	0.220375	0.942781
PC.46.1.	0.69	0.71	0.9079	-0.0185294	34	95% CI(-0.31 - 0.27)	0.898509	0.957251	4.09476e-05	0.957251
PC.O.30.0.	0.2	0.22	0.17	-0.0220513	39	95% CI(-0.05 - 0)	0.0649214	0.0602274	0.252778	0.0649214
PC.O.32.0.	1.85	1.86	0.903	-0.0148718	39	95% CI(-0.14 - 0.11)	0.815761	0.764127	0.00108595	0.764127
PC.O.32.1.	0.82	0.85	0.4616	-0.0323077	39	95% CI(-0.08 - 0.01)	0.154648	0.13892	0.00654333	0.13892
PC.O.32.2.	0.27	0.28	0.4961	-0.0138462	39	95% CI(-0.04 - 0.02)	0.337827	0.661594	0.0154625	0.661594
PC.O.33.2.	0	0	1	0	39	95% CI(0 - 0)	1	1	5.11869e-13	1
PC.O.33.3.	0.08	0.09	0.7816	-0.00432432	37	95% CI(-0.04 - 0.03)	0.796841	0.731557	3.35459e-05	0.731557
PC.O.34.0.	0.33	0.32	0.7868	0.00594595	37	95% CI(-0.03 - 0.04)	0.753294	0.622975	0.104819	0.753294
PC.O.34.1.	4.16	4.11	0.8436	0.0405128	39	95% CI(-0.18 - 0.26)	0.715885	0.711522	0.0291195	0.711522
PC.O.34.2.	6.21	6.59	0.4456	-0.384615	39	95% CI(-1.06 - 0.29)	0.254607	0.150111	6.05941e-05	0.150111
PC.O.34.3.	6.26	6.61	0.4174	-0.348462	39	95% CI(-0.86 - 0.16)	0.176687	0.301753	0.0157789	0.301753
PC.O.34.4.	0.45	0.48	0.3132	-0.0264103	39	95% CI(-0.06 - 0.01)	0.13912	0.234917	0.301711	0.13912
PC.O.35.3.	0.77	0.78	0.8733	-0.0102632	38	95% CI(-0.11 - 0.09)	0.832713	0.896149	0.029801	0.896149
PC.O.35.4.	0.22	0.23	0.9425	-0.00179487	39	95% CI(-0.03 - 0.03)	0.912834	0.436826	0.000108662	0.436826
PC.O.36.1.	0	0	0.7649	0.00025641	39	95% CI(0 - 0)	0.660579	0.765594	9.92801e-11	0.765594
PC.O.36.2.	2.16	2.25	0.5557	-0.0928205	39	95% CI(-0.28 - 0.09)	0.320537	0.22738	0.00176304	0.22738
PC.O.36.3.	5.58	5.87	0.4728	-0.290513	39	95% CI(-0.81 - 0.22)	0.260956	0.142264	0.00056768	0.142264
PC.O.36.4.	17.87	18.04	0.8735	-0.170769	39	95% CI(-1.75 - 1.41)	0.828207	0.812468	0.00901652	0.812468
PC.O.36.5.	11.83	12	0.8194	-0.175641	39	95% CI(-1.25 - 0.9)	0.742331	0.777315	0.00261842	0.777315
PC.O.36.6.	0.34	0.36	0.5173	-0.0151282	39	95% CI(-0.05 - 0.02)	0.333295	0.722849	0.25488	0.333295
PC.O.37.6.	0.2	0.22	0.5405	-0.0115789	38	95% CI(-0.04 - 0.02)	0.446874	0.941208	4.73138e-05	0.941208
PC.O.38.2.	0.21	0.22	0.4795	-0.0108571	35	95% CI(-0.04 - 0.02)	0.442461	0.90469	0.64329	0.442461
PC.O.38.3.	0.45	0.51	0.1357	-0.0678125	32	95% CI(-0.15 - 0.01)	0.0945997	0.272372	0.275318	0.0945997
PC.O.38.4.	9.74	9.78	0.9411	-0.0389744	39	95% CI(-0.79 - 0.71)	0.916439	0.873255	0.0136251	0.873255
PC.O.38.5.	15.77	15.86	0.9004	-0.095641	39	95% CI(-0.97 - 0.78)	0.826206	0.856026	0.085134	0.826206
PC.O.38.6.	4.66	4.73	0.8213	-0.0648718	39	95% CI(-0.42 - 0.3)	0.717249	0.601609	0.0211317	0.601609
PC.O.40.3.	0.21	0.21	0.9171	0.00157895	38	95% CI(-0.02 - 0.02)	0.876485	0.700599	0.0971647	0.876485
PC.O.40.4.	0.96	0.95	0.8964	0.00871795	39	95% CI(-0.06 - 0.08)	0.806985	0.838593	0.000231809	0.838593
PC.O.40.5.	2.12	2.09	0.8053	0.0294872	39	95% CI(-0.09 - 0.15)	0.633723	0.472315	0.000397949	0.472315
PC.O.40.6.	2.67	2.68	0.9699	-0.00564103	39	95% CI(-0.16 - 0.15)	0.942395	0.884684	0.0110236	0.884684
PC.O.40.7.	1.23	1.21	0.8665	0.0105128	39	95% CI(-0.07 - 0.09)	0.782712	0.801646	0.0170806	0.801646
PC.O.40.8.	0.24	0.24	1	-2.84742e-18	39	95% CI(-0.01 - 0.01)	1	0.985722	0.0253914	0.985722
PC.O.42.3.	0.18	0.18	0.4831	0.00970588	34	95% CI(-0.02 - 0.04)	0.464851	0.68747	0.322977	0.464851
PC.O.42.4.	0.42	0.43	0.6948	-0.0110256	39	95% CI(-0.05 - 0.02)	0.515932	0.446263	0.0646157	0.515932
PC.O.42.5.	1.03	1.03	0.9162	0.00717949	39	95% CI(-0.06 - 0.07)	0.827931	0.611711	0.00070767	0.611711
PC.O.42.6.	0.79	0.78	0.6613	0.0192308	39	95% CI(-0.02 - 0.06)	0.359733	0.349619	0.562223	0.359733
PC.O.44.4.	0.5	0.47	0.6739	0.0216667	30	95% CI(-0.04 - 0.09)	0.502032	0.299211	2.60991e-06	0.299211
PC.O.44.5.	0.56	0.57	0.7869	-0.0112821	39	95% CI(-0.05 - 0.03)	0.5996	0.733137	0.0173632	0.733137
PC.O.44.6.	0.94	0.93	0.7898	0.0133333	36	95% CI(-0.04 - 0.07)	0.614274	0.620586	0.121156	0.614274
Cer.34.1.	0.1	0.08	0.1639	0.0148718	39	95% CI(0 - 0.03)	0.0909707	0.0996949	0.367944	0.0909707
Cer.38.1.	0.04	0.04	0.8629	0.000769231	39	95% CI(-0.01 - 0.01)	0.854924	0.720547	0.00245375	0.720547
Cer.40.1.	0.52	0.51	0.6939	0.0133333	39	95% CI(-0.03 - 0.06)	0.538979	0.675368	0.00976661	0.675368
Cer.42.1.	2.52	2.56	0.8494	-0.0361538	39	95% CI(-0.22 - 0.15)	0.698057	0.82874	0.000110032	0.82874
Cer.42.2.	1.18	1.16	0.8296	0.0182051	39	95% CI(-0.05 - 0.09)	0.616529	0.511842	0.000126838	0.511842
Cer.43.1.	0.4	0.41	0.7087	-0.00974359	39	95% CI(-0.04 - 0.03)	0.578616	0.521349	0.26304	0.578616
Cer.44.0.	0.11	0.1	0.0344	0.0128205	39	95% CI(0 - 0.03)	0.052486	0.0287705	5.16055e-09	0.0287705
SM.30.1.	0.39	0.38	0.8518	0.00666667	39	95% CI(-0.06 - 0.07)	0.832299	0.785505	0.0110294	0.785505
SM.31.1.	0.76	0.72	0.4623	0.0448718	39	95% CI(-0.07 - 0.16)	0.436711	0.434481	0.119547	0.436711
SM.32.1.	8	7.82	0.7101	0.186154	39	95% CI(-0.45 - 0.83)	0.559549	0.368057	0.918974	0.559549
SM.32.2.	0.57	0.57	0.9076	0.00410256	39	95% CI(-0.06 - 0.07)	0.899644	0.742883	0.685639	0.899644
SM.33.1.	18.97	18.41	0.6578	0.561026	39	95% CI(-0.79 - 1.91)	0.405232	0.342616	0.36322	0.405232
SM.33.2.	7.93	31.19	0.2476	-23.266	10	95% CI(-67.88 - 21.35)	0.268407	0.322266	1.62138e-06	0.322266
SM.34.1.	107.33	105.76	0.731	1.56667	39	95% CI(-3.47 - 6.61)	0.533061	0.652948	0.487346	0.533061
SM.34.2.	17.52	17.29	0.7768	0.223077	39	95% CI(-0.59 - 1.04)	0.582259	0.721932	0.75895	0.582259
SM.35.1.	3.01	2.95	0.8002	0.0528205	39	95% CI(-0.16 - 0.27)	0.61953	0.716725	0.0413108	0.716725
SM.36.0.	0.38	0.36	0.725	0.0174286	35	95% CI(-0.06 - 0.09)	0.633371	0.965903	0.149849	0.633371
SM.36.1.	14.29	13.77	0.4899	0.517436	39	95% CI(-0.37 - 1.4)	0.244969	0.222034	0.112817	0.244969
SM.36.2.	7.36	7.16	0.586	0.203333	39	95% CI(-0.2 - 0.61)	0.312773	0.227385	0.519377	0.312773
SM.37.1.	2.47	2.4	0.7031	0.0702564	39	95% CI(-0.13 - 0.27)	0.474487	0.586264	0.145489	0.474487
SM.38.1.	21.02	20.33	0.5234	0.684615	39	95% CI(-0.61 - 1.98)	0.289904	0.152586	0.119977	0.289904
SM.38.2.	8.52	8.3	0.5898	0.228974	39	95% CI(-0.26 - 0.71)	0.346022	0.295267	0.822076	0.346022
SM.38.3.	0.59	0.65	0.2861	-0.0617949	39	95% CI(-0.16 - 0.04)	0.207083	0.235496	0.0754561	0.207083
SM.39.1.	7.01	6.85	0.7058	0.161282	39	95% CI(-0.41 - 0.73)	0.570251	0.468025	0.286617	0.570251
SM.39.2.	0.73	0.7	0.5645	0.0282051	39	95% CI(-0.04 - 0.1)	0.399843	0.204364	0.0225629	0.204364
SM.40.1.	10.94	10.83	0.8568	0.11359	39	95% CI(-0.67 - 0.9)	0.771466	0.640131	0.42101	0.771466
SM.40.2.	26.16	25.58	0.6823	0.582051	39	95% CI(-0.91 - 2.08)	0.436009	0.24671	0.0212351	0.24671
SM.40.4.	0.01	0.01	0.5364	0.000512821	39	95% CI(0 - 0)	0.323636	0.423711	9.92801e-11	0.423711
SM.41.1.	18.09	17.84	0.7977	0.244359	39	95% CI(-1.19 - 1.68)	0.731674	0.507393	0.755507	0.731674
SM.41.2.	12.41	12.4	0.9873	0.0110256	39	95% CI(-0.85 - 0.87)	0.979516	0.877991	0.450476	0.979516
SM.42.1.	30.43	30.05	0.8369	0.382051	39	95% CI(-2.12 - 2.88)	0.758654	0.716712	0.369756	0.758654
SM.42.2.	58.33	57.5	0.7733	0.833333	39	95% CI(-2.77 - 4.44)	0.642422	0.398178	0.125294	0.642422
SM.42.3.	27.55	27.06	0.7159	0.492308	39	95% CI(-1.04 - 2.03)	0.519847	0.261254	0.69017	0.519847
SM.43.1.	5.77	5.03	0.4925	0.734359	39	95% CI(-1.4 - 2.87)	0.490493	0.798511	7.73563e-10	0.798511
SM.43.2.	3.26	3.3	0.8667	-0.0469697	33	95% CI(-0.47 - 0.38)	0.823189	0.805035	0.00337687	0.805035
SM.44.1.	1.19	1.15	0.7952	0.0451282	39	95% CI(-0.29 - 0.38)	0.78891	0.480969	0.000547966	0.480969
CE.16.0.	123.97	125.13	0.8609	-1.15897	39	95% CI(-11.1 - 8.78)	0.81471	0.922179	0.344649	0.81471
CE.17.1.	4.3	4.48	0.5831	-0.176923	39	95% CI(-0.68 - 0.33)	0.479925	0.812472	0.0250642	0.812472
CE.17.2.	1.19	1.3	0.1235	-0.106667	39	95% CI(-0.24 - 0.03)	0.11673	0.349702	0.0123548	0.349702
CE.18.1.	118.37	119.92	0.9083	-1.54615	39	95% CI(-24.9 - 21.81)	0.894089	0.895725	0.225391	0.894089
CE.18.2.	3247.64	3315.54	0.7496	-67.8974	39	95% CI(-295.81 - 160.01)	0.550028	0.442876	0.377131	0.550028
CE.18.3.	155.93	149.7	0.6332	6.23077	39	95% CI(-16.84 - 29.3)	0.587764	0.605612	0.0962983	0.587764
CE.19.2.	3.32	3.52	0.5229	-0.198462	39	95% CI(-0.53 - 0.13)	0.23425	0.293055	0.00753125	0.293055
CE.19.3.	1.98	2	0.768	-0.0264103	39	95% CI(-0.15 - 0.1)	0.676994	0.845098	0.165065	0.676994
CE.20.4.	1943.46	1926.51	0.9034	16.9487	39	95% CI(-157.6 - 191.49)	0.845209	0.785525	0.148879	0.845209
CE.20.5.	129.33	113.33	0.415	15.9974	39	95% CI(-14.91 - 46.91)	0.301392	0.0763401	4.65517e-07	0.0763401
CE.22.5.	27.11	31.48	0.5327	-4.36833	18	95% CI(-18.32 - 9.58)	0.517625	0.831726	0.0780182	0.517625
CE.22.6.	117.16	116.75	0.9687	0.415385	39	95% CI(-12.68 - 13.51)	0.949138	0.753513	0.00166047	0.753513
DG.32.1.	2.18	2.08	0.7612	0.0917949	39	95% CI(-0.42 - 0.6)	0.71848	0.983298	6.05063e-07	0.983298
DG.32.2.	1.11	1.1	0.8748	0.015641	39	95% CI(-0.17 - 0.2)	0.866992	0.502944	3.60597e-06	0.502944
DG.34.1.	8.62	8.27	0.7091	0.350513	39	95% CI(-1.11 - 1.81)	0.629642	0.807059	2.12104e-06	0.807059
DG.34.3.	1.65	1.59	0.7551	0.0623077	39	95% CI(-0.26 - 0.38)	0.693934	0.766237	7.80202e-07	0.766237
DG.36.2.	6.4	6.29	0.8624	0.110513	39	95% CI(-0.89 - 1.11)	0.823764	0.983491	6.1655e-07	0.983491
DG.36.3.	7.23	7.31	0.9249	-0.0779487	39	95% CI(-1.19 - 1.03)	0.887754	0.917591	6.43601e-08	0.917591
DG.36.4.	2.74	2.72	0.9512	0.0238462	39	95% CI(-0.42 - 0.47)	0.913735	0.807059	1.12627e-08	0.807059
DG.39.0.	3.85	3.24	0.2565	0.603333	39	95% CI(-0.27 - 1.48)	0.171223	0.118053	1.16491e-07	0.118053
DG.41.1.	3.19	3.07	0.6378	0.118718	39	95% CI(-0.24 - 0.47)	0.502924	0.764144	0.0812628	0.502924
DG.42.0.	0.7	0.69	0.9049	0.00641026	39	95% CI(-0.06 - 0.07)	0.839549	0.556948	0.0809447	0.839549
DG.42.1.	3.31	3.42	0.6825	-0.111538	39	95% CI(-0.46 - 0.24)	0.524133	0.665298	0.0639277	0.524133
DG.44.3.	1.36	1.36	0.9797	0.00333333	39	95% CI(-0.16 - 0.17)	0.967957	0.528128	0.00196713	0.528128
DG.O.32.2.	1.17	1.11	0.6955	0.054359	39	95% CI(-0.18 - 0.29)	0.644463	0.594945	5.42946e-06	0.594945
DG.O.34.1.	4.12	3.97	0.6938	0.152821	39	95% CI(-0.46 - 0.76)	0.613924	0.872499	7.35755e-06	0.872499
DG.O.36.4.	0.42	0.42	0.8485	-0.00358974	39	95% CI(-0.04 - 0.03)	0.819885	0.931118	0.217989	0.819885
TG.46.2.	4.13	3.86	0.801	0.268974	39	95% CI(-1.54 - 2.08)	0.765284	0.928548	3.22595e-08	0.928548
TG.48.1.	38.88	33.56	0.4805	5.32667	39	95% CI(-7.31 - 17.97)	0.3989	0.594945	2.12503e-07	0.594945
TG.48.2.	26.42	24.51	0.6875	1.90282	39	95% CI(-6.28 - 10.09)	0.64064	0.645143	3.18213e-06	0.645143
TG.48.3.	2.65	2.44	0.7355	0.212308	39	95% CI(-0.94 - 1.37)	0.711367	0.673729	2.36666e-07	0.673729
TG.49.1.	6.36	6.32	0.9774	0.0328205	39	95% CI(-1.51 - 1.58)	0.965906	0.863076	2.04673e-06	0.863076
TG.49.2.	3.53	3.64	0.8574	-0.105897	39	95% CI(-0.95 - 0.74)	0.800181	0.927876	3.90404e-06	0.927876
TG.50.1.	93.57	83.68	0.507	9.88718	39	95% CI(-13.22 - 33)	0.391894	0.55211	6.28804e-07	0.55211
TG.50.2.	123.46	115.31	0.6294	8.15128	39	95% CI(-19.03 - 35.34)	0.547445	0.756177	1.48614e-06	0.756177
TG.50.3.	64.66	62.12	0.7634	2.53846	39	95% CI(-11 - 16.08)	0.706436	0.591074	3.02836e-06	0.591074
TG.50.4.	29.4	28.09	0.7309	1.30872	39	95% CI(-4.41 - 7.03)	0.646048	0.468042	2.61497e-05	0.468042
TG.51.1.	0.08	0.08	0.7688	-0.00512821	39	95% CI(-0.02 - 0.01)	0.524321	0.797333	5.24252e-09	0.797333
TG.51.2.	7.54	7.52	0.9893	0.0146154	39	95% CI(-1.27 - 1.3)	0.981722	0.827792	1.57224e-07	0.827792
TG.51.3.	6.84	6.8	0.9556	0.0430769	39	95% CI(-1.03 - 1.11)	0.935392	0.774816	2.62912e-07	0.774816
TG.51.4.	2.9	2.85	0.8941	0.0458974	39	95% CI(-0.4 - 0.49)	0.834369	0.422298	5.53129e-07	0.422298
TG.52.2.	271.59	257.53	0.6106	14.0564	39	95% CI(-26.25 - 54.36)	0.484463	0.771767	2.86905e-05	0.771767
TG.52.3.	338.59	332.51	0.8605	6.07692	39	95% CI(-39.44 - 51.6)	0.788421	0.640139	2.9184e-06	0.640139
TG.52.4.	168.54	166.38	0.9161	2.1641	39	95% CI(-22.08 - 26.4)	0.857532	0.494099	9.2239e-07	0.494099
TG.52.5.	36.88	33.65	0.5165	3.22821	39	95% CI(-3.36 - 9.82)	0.327509	0.328638	3.47907e-08	0.328638
TG.52.6.	5.13	4.45	0.3183	0.675897	39	95% CI(-0.27 - 1.62)	0.154907	0.156639	9.30998e-06	0.156639
TG.53.3.	0.27	0.27	0.959	0.00179487	39	95% CI(-0.04 - 0.04)	0.927835	0.658208	5.1094e-08	0.658208
TG.53.4.	3.29	3.23	0.8961	0.0525641	39	95% CI(-0.43 - 0.53)	0.825942	0.72718	1.09565e-07	0.72718
TG.53.5.	1.8	1.67	0.5813	0.130513	39	95% CI(-0.15 - 0.41)	0.345906	0.267231	1.28544e-08	0.267231
TG.53.6.	0.38	0.3	0.0954	0.08	38	95% CI(0.02 - 0.14)	0.0106353	0.00774134	4.21306e-07	0.00774134
TG.54.2.	1.38	1.52	0.475	-0.140769	39	95% CI(-0.5 - 0.21)	0.426172	0.721941	0.0258028	0.721941
TG.54.3.	64.96	60.54	0.5068	4.42051	39	95% CI(-5.39 - 14.23)	0.367555	0.529596	4.48762e-06	0.529596
TG.54.4.	87.06	81.34	0.5739	5.71538	39	95% CI(-7.16 - 18.59)	0.374584	0.57591	1.36657e-07	0.57591
TG.54.5.	74.45	68.46	0.551	5.99231	39	95% CI(-5.46 - 17.45)	0.296242	0.388194	1.18016e-08	0.388194
TG.54.6.	40.84	35.74	0.3968	5.09692	39	95% CI(-2.14 - 12.33)	0.162071	0.151075	1.80014e-08	0.151075
TG.54.7.	5.2	4.07	0.2379	1.13154	39	95% CI(-0.25 - 2.51)	0.104607	0.131765	9.43033e-09	0.131765
TG.55.6.	1.27	1.05	0.2721	0.218974	39	95% CI(0 - 0.44)	0.0548749	0.0401417	2.98486e-10	0.0401417
TG.55.7.	2.44	1.84	0.1272	0.601026	39	95% CI(0.01 - 1.19)	0.046042	0.0614691	5.66061e-08	0.0614691
TG.55.8.	0.52	0.45	0.2803	0.0725641	39	95% CI(-0.04 - 0.19)	0.212229	0.285691	1.10367e-07	0.285691
TG.55.9.	0.74	0.67	0.4717	0.0676923	39	95% CI(-0.08 - 0.21)	0.345471	0.543808	4.22857e-06	0.543808
TG.56.6.	11.04	10.26	0.3663	0.771282	39	95% CI(-0.31 - 1.85)	0.155153	0.113214	0.0591674	0.155153
TG.56.7.	11.44	10.39	0.373	1.05385	39	95% CI(-0.44 - 2.55)	0.162446	0.070732	0.0155336	0.070732
TG.56.8.	9	7.89	0.3234	1.10769	39	95% CI(-0.27 - 2.49)	0.111947	0.0399607	0.0112193	0.0399607
